# Supplementary material for: Respiratory Syncytial Virus Vaccines: A Review of the Candidates and the Approved Vaccines
Source: MDPI journal article supplement (doi:10.3390/pathogens12101259), 2023-10-19
Supplement: s1 [file s1]

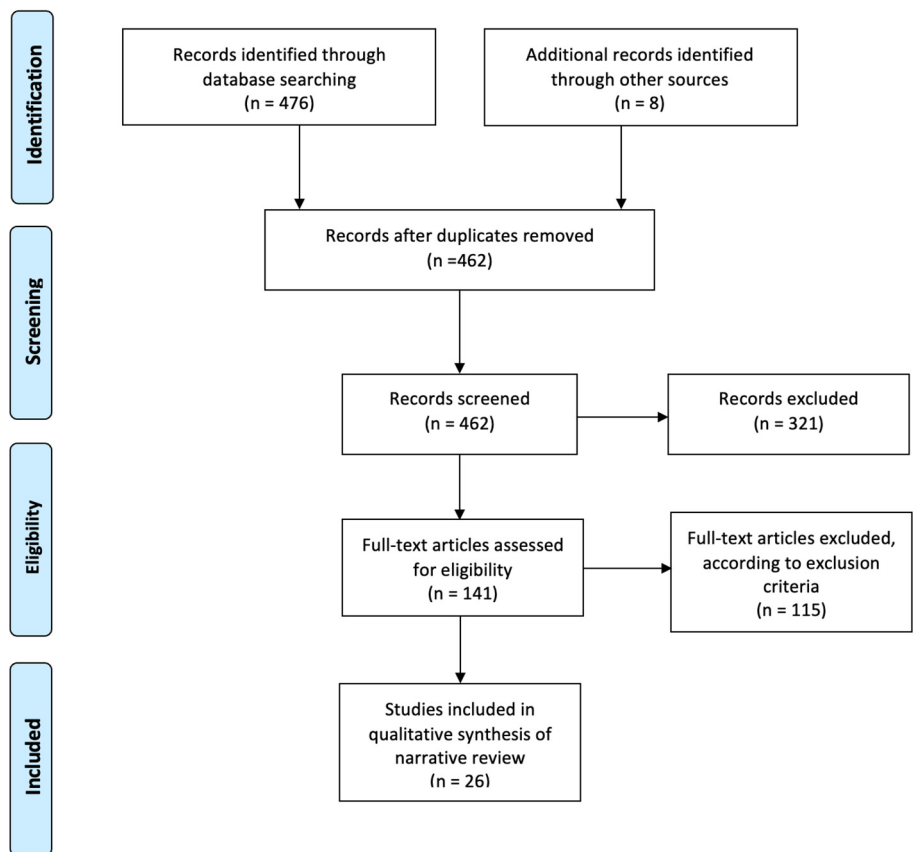

**Figure S1.** Prisma flowchart presenting the process of selecting the published articles of the clinical trials.
